# Supplementary material
Source: publisher figshare collection journal article supplement (https://acs.figshare.com/ndownloader/files/3868426)
Supplement: Supplementary file 1 [file 3868426]

28
3a – gas phase
H	0.943863	1.269626	2.719275
Pd	1.08812	-0.024408	0.373259
C	0.66188	1.49591	1.698085
Br	3.243823	-0.540818	-0.722277
Br	-0.070963	-2.297328	0.162707
C	1.63869	2.002467	0.802842
H	2.642553	2.06132	1.205066
C	-0.59204	1.039646	1.237884
H	-1.178458	0.476573	1.955017
H	-1.981951	-1.083719	-0.035913
C	1.387288	2.921105	-0.295209
C	-1.359337	1.612417	0.144561
C	-2.796884	-0.347147	-0.110113
H	2.273365	3.428765	-0.658772
C	0.224403	3.227139	-0.904924
N	-2.643805	0.972811	-0.030583
C	-1.043612	2.577726	-0.740814
N	-4.084154	-0.604298	-0.311041
H	0.262051	3.971045	-1.691192
C	-3.873048	1.575945	-0.185151
H	-1.79579	2.824534	-1.482238
C	-4.777752	0.585664	-0.364619
H	-3.991235	2.643509	-0.136796
H	-5.842469	0.622981	-0.512682
C	-4.640901	-1.942676	-0.460272
H	-5.098433	-2.042263	-1.442888
H	-3.831442	-2.6629	-0.363087
H	-5.38208	-2.120333	0.316959
28
3a – in CH2Cl2
H	0.790218	1.35972	2.664896
Pd	1.121667	0.005165	0.363268
C	0.530841	1.538313	1.628249
Br	3.474748	-0.444829	-0.493754
Br	0.067644	-2.298913	-0.054159
C	1.494225	2.106684	0.768515
H	2.465431	2.277709	1.216871
C	-0.659453	0.9613	1.129464
H	-1.214965	0.368361	1.846634
H	-2.202633	-1.200058	-0.073755
C	1.232165	2.908938	-0.411255
C	-1.46781	1.481172	0.037875
C	-2.982849	-0.444668	-0.090586
H	2.097441	3.445324	-0.785017
C	0.071967	3.093982	-1.07635
N	-2.769735	0.870575	-0.048074
C	-1.180202	2.424273	-0.881033
N	-4.28864	-0.652171	-0.162867
H	0.09383	3.782155	-1.913399
C	-3.985253	1.520166	-0.097379
H	-1.955112	2.656876	-1.602277
C	-4.936462	0.56218	-0.171999
H	-4.058987	2.592809	-0.061244
H	-6.008995	0.633526	-0.223199
C	-4.935338	-1.956314	-0.232146
H	-5.462463	-2.047358	-1.179787
H	-4.17209	-2.727303	-0.162616
H	-5.634418	-2.053373	0.595958
28
3a – in MeCN
H	0.75718	1.345201	2.669708
Pd	1.126306	0.002987	0.363795
C	0.505526	1.524389	1.631298
Br	3.505595	-0.414142	-0.471511
Br	0.101225	-2.305147	-0.097303
C	1.469114	2.109987	0.784905
H	2.432978	2.29302	1.24439
C	-0.673241	0.934169	1.120482
H	-1.224952	0.332291	1.83306
H	-2.259852	-1.227314	0.016125
C	1.211069	2.905767	-0.39903
C	-1.483122	1.452897	0.029311
C	-3.02397	-0.460229	-0.042075
H	2.073205	3.453335	-0.763848
C	0.054598	3.075538	-1.075364
N	-2.788756	0.852811	-0.0521
C	-1.194495	2.398998	-0.886923
N	-4.330851	-0.649714	-0.130755
H	0.075864	3.763924	-1.912385
C	-3.992849	1.518439	-0.154853
H	-1.96839	2.634793	-1.607905
C	-4.957457	0.573139	-0.206685
H	-4.04976	2.592689	-0.167907
H	-6.027705	0.658425	-0.280751
C	-5.002951	-1.942738	-0.152489
H	-5.479004	-2.084513	-1.120773
H	-4.26431	-2.722265	0.014765
H	-5.750111	-1.965693	0.637966
28
3a – in DMSO
H	0.748904	1.344291	2.669246
Pd	1.126919	0.001664	0.364529
C	0.500314	1.52239	1.629933
Br	3.508178	-0.407799	-0.47051
Br	0.104788	-2.308243	-0.094088
C	1.465734	2.108483	0.786101
H	2.427926	2.292784	1.248587
C	-0.675883	0.930566	1.115874
H	-1.229261	0.327991	1.826528
H	-2.265383	-1.231053	-0.02049
C	1.210419	2.903379	-0.398748
C	-1.482915	1.448248	0.022262
C	-3.027774	-0.461394	-0.0626
H	2.072905	3.452378	-0.760529
C	0.056229	3.07079	-1.079438
N	-2.789671	0.850929	-0.058714
C	-1.19271	2.393439	-0.894169
N	-4.336169	-0.646491	-0.135072
H	0.079412	3.759079	-1.91648
C	-3.993041	1.520755	-0.135596
H	-1.965797	2.629087	-1.616122
C	-4.960632	0.578433	-0.185445
H	-4.046954	2.595262	-0.13347
H	-6.031619	0.666979	-0.243347
C	-5.012393	-1.936733	-0.164268
H	-5.490961	-2.070949	-1.132417
H	-4.276427	-2.720118	-0.003293
H	-5.758083	-1.961975	0.62746
28
3a – back H-bond – gas phase
H	0.757107	1.245179	2.7066
Pd	1.188417	0.017353	0.361229
C	0.458238	1.419169	1.680028
Br	3.482616	-0.085277	-0.572541
Br	0.415833	-2.356742	-0.041711
C	1.337581	2.114736	0.816745
H	2.298102	2.372316	1.245224
C	-0.67219	0.724052	1.186162
H	-1.146376	0.045124	1.885515
H	-4.2437	1.898112	0.044289
C	0.959034	2.923428	-0.329536
C	-1.533473	1.175284	0.106369
C	-3.975312	0.86024	-0.050702
H	1.755443	3.557351	-0.702361
C	-0.220868	2.996855	-0.97823
N	-2.736685	0.382519	-0.015082
C	-1.373858	2.162217	-0.797818
N	-4.818138	-0.158296	-0.201536
H	-0.285089	3.697581	-1.801671
C	-2.777488	-0.990694	-0.132111
H	-2.156737	2.27828	-1.539685
C	-4.084575	-1.324624	-0.249495
H	-1.858598	-1.582851	-0.132796
H	-4.552329	-2.285398	-0.372607
C	-6.268358	-0.063593	-0.265593
H	-6.708984	-0.555148	0.60013
H	-6.556178	0.985034	-0.269251
H	-6.624193	-0.535165	-1.179676
28
3a – back H-bond – in CH2Cl2
H	0.634265	1.214948	2.720058
Pd	1.192758	0.031675	0.367237
C	0.361325	1.396782	1.687481
Br	3.557305	0.001147	-0.574203
Br	0.532235	-2.40568	-0.051312
C	1.23866	2.138686	0.865617
H	2.167703	2.434429	1.337909
C	-0.720017	0.667093	1.144234
H	-1.186047	-0.038316	1.822248
H	-4.292234	1.878754	-0.023774
C	0.870819	2.948624	-0.280487
C	-1.587551	1.111936	0.06358
C	-4.034921	0.834773	-0.082883
H	1.646285	3.63121	-0.610179
C	-0.293214	2.981827	-0.962339
N	-2.798848	0.3395	-0.040902
C	-1.429524	2.11955	-0.818027
N	-4.886856	-0.17298	-0.196779
H	-0.366425	3.70132	-1.769505
C	-2.867504	-1.036625	-0.120595
H	-2.219015	2.262794	-1.546742
C	-4.178116	-1.353093	-0.221052
H	-1.972004	-1.644457	-0.112197
H	-4.669157	-2.306028	-0.314941
C	-6.337872	-0.060599	-0.271043
H	-6.782204	-0.597392	0.564598
H	-6.611982	0.989593	-0.218384
H	-6.682574	-0.4846	-1.212134
28
3a – back H-bond – in MeCN
H	0.620999	1.216247	2.721962
Pd	1.194476	0.03278	0.369914
C	0.350074	1.395334	1.688418
Br	3.569145	0.016056	-0.573422
Br	0.548598	-2.411369	-0.061074
C	1.225023	2.142212	0.869452
H	2.150018	2.445419	1.345232
C	-0.726035	0.659862	1.144082
H	-1.188945	-0.046444	1.823223
H	-4.296323	1.877949	-0.061861
C	0.85753	2.946418	-0.280033
C	-1.596267	1.099692	0.06394
C	-4.042413	0.831974	-0.096733
H	1.629184	3.634497	-0.607451
C	-0.305358	2.970739	-0.965047
N	-2.808898	0.331061	-0.033259
C	-1.439704	2.106713	-0.819201
N	-4.897677	-0.172867	-0.199872
H	-0.382255	3.690239	-1.771978
C	-2.885179	-1.046318	-0.087783
H	-2.232154	2.252381	-1.544077
C	-4.196289	-1.357367	-0.194846
H	-1.995437	-1.660155	-0.06222
H	-4.692831	-2.308674	-0.275884
C	-6.347265	-0.052239	-0.290073
H	-6.801539	-0.545373	0.566846
H	-6.609984	1.002057	-0.291284
H	-6.686306	-0.519573	-1.212346
28
3a – back H-bond – in DMSO
H	0.619115	1.221006	2.720633
Pd	1.194596	0.032074	0.371014
C	0.349094	1.397549	1.686436
Br	3.571443	0.016507	-0.568178
Br	0.547313	-2.410123	-0.066039
C	1.224818	2.142084	0.866717
H	2.148906	2.447535	1.342884
C	-0.726309	0.660529	1.142994
H	-1.189624	-0.044077	1.823662
H	-4.29683	1.879653	-0.061777
C	0.859575	2.94088	-0.286958
C	-1.59685	1.099105	0.062683
C	-4.043477	0.833534	-0.094773
H	1.632504	3.626355	-0.616806
C	-0.302611	2.963698	-0.973043
N	-2.810279	0.332061	-0.031584
C	-1.439167	2.103588	-0.823034
N	-4.899072	-0.170979	-0.19607
H	-0.377846	3.679958	-1.782999
C	-2.887213	-1.045163	-0.084677
H	-2.232005	2.249225	-1.547439
C	-4.198435	-1.355628	-0.190615
H	-1.997884	-1.659624	-0.05993
H	-4.695473	-2.306758	-0.270538
C	-6.348195	-0.050447	-0.287722
H	-6.803497	-0.541049	0.57013
H	-6.611042	1.003805	-0.292468
H	-6.686139	-0.520864	-1.208835
38
3d – gas phase
H	-3.115405	1.769808	-1.887619
Pd	-1.991384	-0.112545	-0.338252
C	-2.59413	1.769224	-0.937967
Br	-3.272553	-1.854678	0.857167
Br	-0.170438	-1.580237	-1.398174
C	-3.311685	1.466816	0.249502
H	-4.346413	1.184154	0.099429
C	-1.186183	1.81721	-0.956345
H	-0.731309	1.845553	-1.940039
H	1.111889	0.288645	-1.144415
C	-3.035557	2.018685	1.565186
C	-0.330282	2.28234	0.122475
C	1.638406	1.197015	-0.8229
H	-3.862501	1.943123	2.261999
C	-1.912342	2.605835	2.024419
N	1.072673	2.237875	-0.215784
C	-0.634325	2.667968	1.377552
N	2.944641	1.416451	-0.90027
H	-1.931092	2.974486	3.042758
C	2.054553	3.152074	0.104768
H	0.194135	2.960992	2.012978
C	3.230241	2.629385	-0.315279
H	1.826995	4.089698	0.578724
H	4.231721	3.017661	-0.26151
C	3.911501	0.406292	-1.356429
H	3.41084	-0.175832	-2.129666
H	4.747854	0.935741	-1.811063
C	4.361381	-0.470749	-0.215959
C	3.504919	-1.452622	0.27477
C	5.607768	-0.285785	0.369475
C	3.893902	-2.234352	1.350464
H	2.529979	-1.612254	-0.178622
C	5.997115	-1.072991	1.444229
H	6.283588	0.470005	-0.017099
C	5.138682	-2.044892	1.93615
H	3.221093	-2.994404	1.726506
H	6.970602	-0.927684	1.895481
H	5.441366	-2.659616	2.774701
38
3d – in CH2Cl2
H	-2.944918	1.846235	-2.018554
Pd	-2.162998	-0.078427	-0.311578
C	-2.467272	1.836258	-1.046291
Br	-3.851151	-1.602551	0.82043
Br	-0.432227	-1.839863	-1.030876
C	-3.269392	1.740234	0.112281
H	-4.330191	1.622839	-0.07365
C	-1.067213	1.661484	-0.995127
H	-0.585668	1.546592	-1.959264
H	1.26201	-0.004311	-0.997238
C	-2.952115	2.274523	1.423288
C	-0.18408	2.124923	0.062827
C	1.77994	0.927072	-0.784929
H	-3.801272	2.343435	2.094329
C	-1.766865	2.710292	1.900242
N	1.212948	2.019243	-0.273546
C	-0.476398	2.614546	1.284532
N	3.070753	1.168926	-0.956793
H	-1.762788	3.114762	2.905626
C	2.182192	2.988337	-0.112104
H	0.361166	2.906254	1.907603
C	3.347496	2.450203	-0.536488
H	1.95043	3.967218	0.269169
H	4.338095	2.866381	-0.592897
C	4.053044	0.188429	-1.440124
H	3.509961	-0.521035	-2.061796
H	4.759053	0.730331	-2.066988
C	4.751318	-0.508199	-0.300008
C	4.190786	-1.64714	0.270759
C	5.945499	-0.006252	0.207223
C	4.81138	-2.270575	1.343417
H	3.264324	-2.049069	-0.125333
C	6.567119	-0.629179	1.280789
H	6.393243	0.873825	-0.241402
C	5.999357	-1.760503	1.851301
H	4.367787	-3.156505	1.78126
H	7.496401	-0.231722	1.670811
H	6.483834	-2.246973	2.689355
38
3d – in MeCN
H	-2.920054	1.858168	-2.033658
Pd	-2.172311	-0.074599	-0.314938
C	-2.448849	1.844506	-1.058338
Br	-3.879188	-1.584276	0.831861
Br	-0.456942	-1.856991	-1.02223
C	-3.259874	1.76027	0.094676
H	-4.320932	1.657378	-0.098903
C	-1.051889	1.652357	-0.998635
H	-0.566815	1.528158	-1.959811
H	1.287864	-0.013677	-1.007546
C	-2.944802	2.290625	1.407221
C	-0.168759	2.110166	0.061587
C	1.799476	0.917495	-0.787457
H	-3.797585	2.373319	2.07221
C	-1.756329	2.711707	1.890417
N	1.22811	2.005589	-0.271691
C	-0.464058	2.604297	1.281158
N	3.089314	1.164101	-0.955919
H	-1.752939	3.119385	2.894588
C	2.194409	2.977389	-0.105051
H	0.371942	2.897575	1.905507
C	3.361664	2.444668	-0.530537
H	1.958738	3.953681	0.280699
H	4.351669	2.862816	-0.585655
C	4.076279	0.190735	-1.442687
H	3.537641	-0.518168	-2.068439
H	4.781972	0.739846	-2.063025
C	4.773694	-0.507489	-0.303148
C	4.223234	-1.658455	0.253405
C	5.957365	0.00514	0.218078
C	4.844035	-2.284417	1.324955
H	3.304525	-2.066579	-0.154337
C	6.579177	-0.620154	1.29043
H	6.394955	0.896196	-0.21829
C	6.02219	-1.764409	1.846223
H	4.408886	-3.18001	1.75187
H	7.500139	-0.213976	1.69121
H	6.507098	-2.252645	2.683116
38
3d – in DMSO
H	-2.918713	1.860287	-2.035245
Pd	-2.174804	-0.074323	-0.315566
C	-2.447534	1.84546	-1.059955
Br	-3.883338	-1.579302	0.835683
Br	-0.46184	-1.859142	-1.021385
C	-3.258833	1.762223	0.092796
H	-4.320135	1.662283	-0.101035
C	-1.051178	1.650189	-1.000244
H	-0.566457	1.525355	-1.961494
H	1.288278	-0.0188	-1.009337
C	-2.942826	2.291624	1.405273
C	-0.167238	2.106626	0.05967
C	1.800056	0.912059	-0.788758
H	-3.795434	2.376061	2.070262
C	-1.753608	2.710174	1.888499
N	1.229173	2.000564	-0.273529
C	-0.461777	2.601175	1.279196
N	3.089995	1.158016	-0.956344
H	-1.749489	3.117583	2.89278
C	2.195822	2.97175	-0.106497
H	0.374599	2.893551	1.903492
C	3.362941	2.43818	-0.530981
H	1.960501	3.948261	0.278906
H	4.353215	2.855736	-0.586026
C	4.077122	0.185709	-1.443581
H	3.538435	-0.525912	-2.066151
H	4.78005	0.73451	-2.067297
C	4.778079	-0.507622	-0.303597
C	4.232264	-1.659458	0.255318
C	5.959925	0.010434	0.21611
C	4.856239	-2.28146	1.327107
H	3.314621	-2.07164	-0.15074
C	6.584983	-0.611157	1.288559
H	6.393963	0.902574	-0.221565
C	6.032937	-1.756639	1.846325
H	4.424788	-3.178004	1.755775
H	7.504848	-0.200976	1.687786
H	6.520719	-2.242154	2.683136
38
3d – back H-bond – gas phase
H	-2.785369	1.52448	-2.423759
Pd	-2.491158	-0.054416	-0.27875
C	-2.294427	1.61696	-1.462542
Br	-4.476905	-0.689692	1.064881
Br	-1.316819	-2.286268	-0.445029
C	-3.054923	2.019473	-0.338932
H	-4.114663	2.148639	-0.520003
C	-0.989068	1.085375	-1.325459
H	-0.583591	0.604397	-2.208063
H	2.55769	2.71123	-0.66899
C	-2.559629	2.727983	0.828501
C	0.011704	1.543414	-0.376372
C	2.457791	1.640676	-0.713992
H	-3.340698	3.144144	1.454467
C	-1.290161	2.935118	1.233079
N	1.315258	0.968556	-0.619291
C	-0.092873	2.359239	0.691723
N	3.447352	0.76954	-0.891487
H	-1.151547	3.517866	2.135518
C	1.573511	-0.379521	-0.752759
H	0.808328	2.519789	1.273646
C	2.911611	-0.499453	-0.920604
H	0.769967	-1.11684	-0.689066
H	3.529572	-1.373138	-1.028256
C	4.866182	1.103576	-1.054618
H	5.141594	0.915179	-2.092564
H	4.962323	2.174167	-0.87103
C	5.735716	0.308498	-0.116446
C	6.658709	-0.600635	-0.615231
C	5.607965	0.470458	1.260348
C	7.450295	-1.341683	0.252363
H	6.764412	-0.733718	-1.686172
C	6.392953	-0.271241	2.12573
H	4.885508	1.175038	1.658288
C	7.316336	-1.178915	1.621714
H	8.167622	-2.049114	-0.14358
H	6.284861	-0.142643	3.195048
H	7.929158	-1.760356	2.298632
38
3d – back H-bond – in CH2Cl2
H	-2.584557	1.30949	-2.614385
Pd	-2.502056	0.027582	-0.247835
C	-2.056203	1.460255	-1.680561
Br	-4.595207	-0.101545	1.195208
Br	-1.692789	-2.389874	-0.040617
C	-2.700654	2.1535	-0.633373
H	-3.72379	2.44607	-0.836883
C	-0.861247	0.734971	-1.464522
H	-0.577806	0.064896	-2.267894
H	2.86757	1.988626	-1.271895
C	-2.06216	2.914925	0.42367
C	0.253035	1.1654	-0.633208
C	2.652999	0.939752	-1.156498
H	-2.738013	3.552413	0.982996
C	-0.761622	2.951213	0.782482
N	1.461799	0.418866	-0.870393
C	0.314392	2.134499	0.302077
N	3.524025	-0.051342	-1.283205
H	-0.494097	3.629803	1.584013
C	1.575654	-0.955813	-0.82154
H	1.264552	2.27086	0.804821
C	2.871583	-1.245456	-1.074919
H	0.72054	-1.58216	-0.602048
H	3.385488	-2.189235	-1.125857
C	4.963941	0.101539	-1.534476
H	5.247984	-0.683074	-2.233304
H	5.102525	1.064114	-2.023162
C	5.762684	0.017455	-0.258994
C	6.218461	-1.211566	0.207728
C	6.031268	1.168604	0.474829
C	6.91836	-1.291208	1.403425
H	6.023518	-2.111905	-0.364278
C	6.732135	1.090511	1.669859
H	5.689405	2.131113	0.110429
C	7.174978	-0.140245	2.136716
H	7.267894	-2.252211	1.760931
H	6.93657	1.992062	2.234616
H	7.720286	-0.202693	3.070669
38
3d – back H-bond – in MeCN
H	-2.590828	1.396539	-2.568112
Pd	-2.512427	0.008604	-0.258213
C	-2.081739	1.519464	-1.619719
Br	-4.643307	-0.236375	1.136139
Br	-1.628293	-2.390165	-0.101988
C	-2.762828	2.145884	-0.554836
H	-3.789256	2.42199	-0.764659
C	-0.871946	0.816684	-1.414299
H	-0.558833	0.191106	-2.242175
H	2.808781	2.204531	-1.119747
C	-2.16651	2.866301	0.55363
C	0.219769	1.246012	-0.553119
C	2.631196	1.143847	-1.064431
H	-2.869838	3.457106	1.130106
C	-0.873269	2.920793	0.937115
N	1.457776	0.562736	-0.820736
C	0.23634	2.167877	0.430536
N	3.539298	0.19492	-1.237127
H	-0.638385	3.566934	1.775
C	1.624782	-0.807715	-0.848294
H	1.179106	2.320313	0.942973
C	2.932305	-1.033748	-1.103986
H	0.795737	-1.478932	-0.670896
H	3.484755	-1.952266	-1.200689
C	4.972245	0.41445	-1.476041
H	5.261357	-0.226216	-2.307168
H	5.087793	1.453316	-1.7784
C	5.787997	0.111739	-0.245093
C	6.397803	-1.128707	-0.090349
C	5.922588	1.069785	0.756159
C	7.126928	-1.412755	1.057121
H	6.302427	-1.87521	-0.870997
C	6.650596	0.787175	1.902523
H	5.45395	2.040478	0.635674
C	7.253531	-0.455683	2.054756
H	7.599158	-2.381169	1.170223
H	6.751068	1.538876	2.676271
H	7.822383	-0.676334	2.950098
38
3d – back H-bond – in DMSO
H	-2.588067	1.400163	-2.567168
Pd	-2.511836	0.008131	-0.259254
C	-2.080422	1.521578	-1.617834
Br	-4.643389	-0.240052	1.13417
Br	-1.626689	-2.390428	-0.105861
C	-2.763729	2.145356	-0.553052
H	-3.790037	2.420875	-0.764201
C	-0.870534	0.819586	-1.41176
H	-0.555458	0.195755	-2.240229
H	2.806071	2.20894	-1.126754
C	-2.169849	2.864866	0.556937
C	0.219527	1.249257	-0.54898
C	2.629919	1.148379	-1.065558
H	-2.874466	3.454186	1.133355
C	-0.876953	2.92142	0.941039
N	1.458028	0.567078	-0.815671
C	0.234313	2.17147	0.434283
N	3.538818	0.199617	-1.233748
H	-0.643725	3.567837	1.779181
C	1.626776	-0.803111	-0.835169
H	1.176675	2.325683	0.946917
C	2.934024	-1.028932	-1.091943
H	0.798915	-1.474519	-0.653097
H	3.487808	-1.947173	-1.183749
C	4.970903	0.418491	-1.47635
H	5.257784	-0.221027	-2.309122
H	5.086728	1.457686	-1.777291
C	5.788035	0.112791	-0.247362
C	6.400218	-1.126911	-0.097586
C	5.918846	1.066334	0.758522
C	7.129416	-1.414158	1.048932
H	6.307406	-1.870292	-0.881487
C	6.646483	0.780291	1.904011
H	5.448302	2.036596	0.642077
C	7.251896	-0.461766	2.051253
H	7.60366	-2.382021	1.158421
H	6.744177	1.528611	2.681386
H	7.820277	-0.685068	2.946256
44
3e – gas phase
H	-2.771937	1.229375	-2.618238
Pd	-2.299564	-0.275705	-0.449336
C	-2.599294	1.427837	-1.567341
Br	-4.018855	-1.807519	0.460456
Br	-0.270082	-1.821464	-0.377661
C	-3.685738	1.351101	-0.661592
H	-4.622058	1.019472	-1.092944
C	-1.262124	1.503294	-1.117804
H	-0.508172	1.351167	-1.881914
H	0.989085	0.115741	-0.328231
C	-3.834263	2.129987	0.556295
C	-0.79435	2.211061	0.062536
C	1.37955	1.095392	-0.025011
H	-4.844596	2.151724	0.948361
C	-2.904681	2.81963	1.246985
N	0.642322	2.180954	0.200715
C	-1.483479	2.814238	1.05113
N	2.642474	1.378546	0.280906
H	-3.244375	3.357058	2.123944
C	1.463535	3.191341	0.658999
H	-0.903803	3.25987	1.851767
C	2.715902	2.685187	0.71629
C	3.727994	0.435769	0.212061
H	1.085121	4.172422	0.881699
H	3.648303	3.12984	1.014199
C	4.678634	0.591565	-0.796515
C	3.764639	-0.60068	1.139566
C	4.820688	-1.50093	1.04062
H	4.870284	-2.320097	1.748519
C	5.710285	-0.331914	-0.84707
H	6.460299	-0.239306	-1.624929
C	5.797336	-1.38315	0.062451
C	4.576952	1.698893	-1.809409
H	3.588392	1.724507	-2.272335
H	4.752564	2.678337	-1.358821
H	5.314461	1.561571	-2.598537
C	2.698353	-0.773538	2.184263
H	2.446592	0.172254	2.66846
H	1.783442	-1.179423	1.740908
H	3.030062	-1.469003	2.95335
C	6.924641	-2.373273	-0.033672
H	6.916267	-2.874442	-1.003539
H	7.890667	-1.875212	0.071364
H	6.851088	-3.13634	0.740494
44
3e – in CH2Cl2
H	-2.744776	1.265455	-2.591236
Pd	-2.410282	-0.263887	-0.401563
C	-2.550162	1.46275	-1.543949
Br	-4.331707	-1.693823	0.455704
Br	-0.484417	-1.948776	-0.187999
C	-3.635127	1.508577	-0.641783
H	-4.602284	1.287692	-1.076857
C	-1.212257	1.405896	-1.093444
H	-0.483095	1.15744	-1.855553
H	1.106578	-0.018372	-0.087226
C	-3.697391	2.270466	0.591464
C	-0.663307	2.127783	0.042717
C	1.506516	0.985906	0.025388
H	-4.696288	2.375227	1.000336
C	-2.700207	2.877669	1.269402
N	0.776459	2.096269	0.099335
C	-1.289324	2.797769	1.030569
N	2.786214	1.322948	0.138272
H	-2.980994	3.437474	2.153869
C	1.619056	3.177762	0.264439
H	-0.65922	3.272821	1.773929
C	2.879198	2.690957	0.29117
C	3.890787	0.399949	0.115572
H	1.242879	4.183088	0.336448
H	3.829851	3.18369	0.395992
C	4.575599	0.217044	-1.083989
C	4.221908	-0.26964	1.290909
C	5.29309	-1.154193	1.240598
H	5.570031	-1.690094	2.141857
C	5.63814	-0.677622	-1.080984
H	6.183787	-0.843486	-2.003427
C	6.008351	-1.371228	0.06767
C	4.188511	0.961272	-2.330106
H	3.13305	0.81476	-2.569376
H	4.353498	2.035262	-2.215397
H	4.779739	0.617667	-3.178006
C	3.452261	-0.055289	2.562753
H	3.324172	1.006652	2.781633
H	2.45628	-0.500358	2.497929
H	3.968777	-0.51789	3.402786
C	7.180988	-2.310423	0.048051
H	7.281962	-2.79797	-0.922549
H	8.110023	-1.766289	0.240241
H	7.084844	-3.079952	0.814931
44
3e – in MeCN
H	-2.665027	1.272176	-2.610727
Pd	-2.4163	-0.256746	-0.403259
C	-2.493608	1.469351	-1.559427
Br	-4.399709	-1.663589	0.378299
Br	-0.52975	-1.963897	-0.057455
C	-3.600274	1.540178	-0.68744
H	-4.560456	1.340182	-1.147627
C	-1.16973	1.384383	-1.072496
H	-0.428236	1.115085	-1.815417
H	1.144274	-0.027042	-0.096703
C	-3.677962	2.294797	0.548802
C	-0.63319	2.112269	0.066036
C	1.537893	0.974619	0.039996
H	-4.684051	2.413865	0.935752
C	-2.686093	2.884816	1.25011
N	0.804438	2.080468	0.139125
C	-1.271798	2.79373	1.037981
N	2.815699	1.310867	0.167529
H	-2.977855	3.447061	2.129606
C	1.644154	3.159172	0.337695
H	-0.652359	3.273857	1.78676
C	2.904979	2.674582	0.357042
C	3.92061	0.390967	0.109596
H	1.265678	4.161687	0.433487
H	3.854327	3.166498	0.476816
C	4.584813	0.232815	-1.10512
C	4.271569	-0.301619	1.265239
C	5.33897	-1.188447	1.177944
H	5.631219	-1.742567	2.06332
C	5.645391	-0.663964	-1.139576
H	6.175651	-0.810693	-2.074248
C	6.033399	-1.382122	-0.01176
C	4.175444	1.004033	-2.327252
H	3.114572	0.86597	-2.547369
H	4.344368	2.074749	-2.190108
H	4.7497	0.678591	-3.193875
C	3.525202	-0.108034	2.553902
H	3.415603	0.95057	2.79765
H	2.521121	-0.535183	2.492708
H	4.048392	-0.597729	3.37435
C	7.201536	-2.325384	-0.071637
H	7.271939	-2.80745	-1.047819
H	8.137909	-1.7855	0.095062
H	7.125312	-3.098036	0.694355
44
3e – in DMSO
H	-2.657467	1.268486	-2.614071
Pd	-2.419939	-0.257476	-0.4027
C	-2.487978	1.46651	-1.562598
Br	-4.410283	-1.654708	0.37942
Br	-0.537957	-1.966852	-0.045419
C	-3.596774	1.543435	-0.694195
H	-4.556513	1.347245	-1.156933
C	-1.165924	1.377005	-1.072057
H	-0.423702	1.103523	-1.812659
H	1.147786	-0.034294	-0.086036
C	-3.674508	2.297753	0.541919
C	-0.629582	2.106416	0.065493
C	1.541333	0.967822	0.045916
H	-4.680947	2.419378	0.92719
C	-2.682333	2.884862	1.245072
N	0.807709	2.073943	0.139525
C	-1.268126	2.791097	1.035046
N	2.81921	1.30592	0.167727
H	-2.974342	3.447809	2.124044
C	1.647018	3.154304	0.329211
H	-0.648689	3.271839	1.783441
C	2.908075	2.67066	0.348374
C	3.926021	0.388734	0.108065
H	1.267915	4.157077	0.419631
H	3.857476	3.163753	0.462542
C	4.579946	0.222775	-1.111122
C	4.290821	-0.291293	1.26657
C	5.360086	-1.17549	1.177121
H	5.662701	-1.720474	2.064664
C	5.643004	-0.670852	-1.147711
H	6.165501	-0.82362	-2.085795
C	6.044256	-1.376999	-0.0171
C	4.155914	0.981287	-2.335686
H	3.09335	0.838954	-2.544285
H	4.323476	2.053747	-2.210478
H	4.721722	0.649399	-3.205459
C	3.554984	-0.089729	2.559562
H	3.439923	0.970477	2.793869
H	2.553506	-0.524538	2.511857
H	4.088716	-0.567239	3.380455
C	7.21403	-2.317558	-0.079396
H	7.281482	-2.802933	-1.054137
H	8.150198	-1.775477	0.081338
H	7.143461	-3.088086	0.689327
44
3e – back H-bond – gas phase
H	2.524279	1.144836	2.755073
Pd	2.866605	0.01288	0.348431
C	2.181		1.356418	1.749614
Br	5.118085	-0.030473	-0.691599
Br	2.10313	-2.356016	-0.099249
C	3.020709	2.090419	0.878043
H	3.996764	2.337312	1.276806
C	1.035145	0.672731	1.276492
H	0.595082	-0.037184	1.967333
H	-2.598114	1.857793	0.292378
C	2.589244	2.944872	-0.214961
C	0.127241	1.158872	0.251353
C	-2.315368	0.828424	0.157061
H	3.364831	3.601125	-0.593038
C	1.382218	3.036031	-0.809068
N	-1.072688	0.360967	0.142856
C	0.243829	2.184146	-0.616109
N	-3.153597	-0.192604	-0.007434
H	1.277901	3.770655	-1.598185
C	-1.105045	-1.008999	-0.021648
H	-0.569743	2.324372	-1.319824
C	-2.411454	-1.35113	-0.117282
C	-4.587465	-0.09423	-0.054668
H	-0.181808	-1.590981	-0.069025
H	-2.882559	-2.307042	-0.261205
C	-5.198694	0.042139	-1.299342
C	-5.299959	-0.152575	1.140196
C	-6.683788	-0.061107	1.061043
H	-7.26281	-0.101983	1.97684
C	-6.583744	0.130975	-1.322101
H	-7.084883	0.243022	-2.276946
C	-7.340565	0.079463	-0.156063
C	-4.391807	0.085529	-2.567472
H	-3.648067	0.884616	-2.545651
H	-3.854963	-0.851463	-2.728749
H	-5.038296	0.253589	-3.426953
C	-4.603087	-0.294255	2.465197
H	-3.867986	-1.100593	2.45211
H	-4.075518	0.624118	2.734265
H	-5.322488	-0.505449	3.254443
C	-8.84125	0.144039	-0.215188
H	-9.178414	0.75845	-1.050314
H	-9.260766	-0.85597	-0.350035
H	-9.257742	0.556292	0.703955
44
3e – back H-bond – in CH2Cl2
H	2.386698	1.252365	2.710224
Pd	2.884317	0.043098	0.356051
C	2.081827	1.419906	1.68421
Br	5.234231	0.012156	-0.621328
Br	2.222863	-2.392864	-0.055084
C	2.930135	2.156511	0.828891
H	3.869411	2.466091	1.271043
C	0.991053	0.674806	1.180953
H	0.550231	-0.0261	1.880094
H	-2.625902	1.855616	0.135798
C	2.526675	2.944302	-0.320863
C	0.087128	1.106686	0.125459
C	-2.360213	0.814339	0.067502
H	3.290924	3.62164	-0.685661
C	1.342489	2.96433	-0.967618
N	-1.123284	0.327048	0.066958
C	0.211829	2.104442	-0.772184
N	-3.210537	-0.202823	-0.017292
H	1.243419	3.669757	-1.78433
C	-1.182705	-1.051363	-0.007678
H	-0.603093	2.237749	-1.474285
C	-2.491806	-1.380354	-0.063383
C	-4.646031	-0.095408	-0.047857
H	-0.281264	-1.650275	-0.027713
H	-2.981877	-2.335243	-0.137808
C	-5.277958	-0.063323	-1.290126
C	-5.338522	-0.054832	1.159715
C	-6.725283	0.032057	1.096302
H	-7.288585	0.067373	2.022499
C	-6.664034	0.026698	-1.29787
H	-7.180089	0.059358	-2.251196
C	-7.401932	0.070832	-0.117972
C	-4.495502	-0.125778	-2.571003
H	-3.765002	0.683602	-2.635084
H	-3.946944	-1.066834	-2.653842
H	-5.163829	-0.048745	-3.427556
C	-4.624594	-0.085208	2.481415
H	-3.876225	-0.878889	2.519655
H	-4.11118	0.860665	2.671136
H	-5.334287	-0.246812	3.291744
C	-8.902686	0.131015	-0.160332
H	-9.250052	0.728422	-1.004607
H	-9.322103	-0.872395	-0.27433
H	-9.309586	0.557369	0.757264
44
3e – back H-bond – in MeCN
H	2.373612	1.251514	2.712563
Pd	2.88614	0.043568	0.358176
C	2.071355	1.417668	1.685591
Br	5.249374	0.027456	-0.615988
Br	2.238075	-2.398748	-0.06753
C	2.918085	2.159285	0.833939
H	3.853901	2.474401	1.279761
C	0.985635	0.667962	1.17954
H	0.546657	-0.034791	1.878028
H	-2.629861	1.852105	0.130775
C	2.515859	2.94295	-0.318327
C	0.080526	1.096593	0.124163
C	-2.366293	0.809873	0.067872
H	3.277035	3.625737	-0.679607
C	1.332933	2.956292	-0.968479
N	-1.130455	0.319631	0.069856
C	0.203904	2.094779	-0.773581
N	-3.217872	-0.205997	-0.014102
H	1.231248	3.662871	-1.783976
C	-1.193166	-1.059257	9.0E-5
H	-0.613657	2.231062	-1.471914
C	-2.502385	-1.385706	-0.055846
C	-4.652799	-0.096845	-0.0468
H	-0.294831	-1.661151	-0.017043
H	-2.995324	-2.33936	-0.127426
C	-5.282801	-0.058331	-1.289669
C	-5.346829	-0.060315	1.159737
C	-6.73362	0.028379	1.095134
H	-7.297981	0.06074	2.020831
C	-6.66901	0.033164	-1.299334
H	-7.183677	0.071098	-2.253306
C	-7.40839	0.073561	-0.120077
C	-4.497886	-0.115394	-2.569007
H	-3.771021	0.697512	-2.628605
H	-3.944606	-1.053873	-2.650297
H	-5.165308	-0.04003	-3.426548
C	-4.633407	-0.096703	2.48112
H	-3.896968	-0.901539	2.520038
H	-4.104514	0.841742	2.664775
H	-5.345656	-0.244328	3.292015
C	-8.909046	0.136829	-0.164163
H	-9.253596	0.745518	-1.001591
H	-9.330288	-0.864267	-0.291697
H	-9.316063	0.551999	0.758577
44
3e – back H-bond – in DMSO
H	2.371865	1.246103	2.715737
Pd	2.886228	0.041959	0.359409
C	2.070134	1.413506	1.688833
Br	5.251673	0.031703	-0.610989
Br	2.238057	-2.3973	-0.080081
C	2.916987	2.156606	0.839044
H	3.852068	2.47229	1.286041
C	0.985089	0.664158	1.181013
H	0.545796	-0.039693	1.878261
H	-2.630601	1.851258	0.141447
C	2.516264	2.939395	-0.314031
C	0.0796	1.095156	0.127093
C	-2.367298	0.809293	0.074311
H	3.278282	3.621232	-0.675339
C	1.333711	2.953657	-0.964656
N	-1.131569	0.3191	0.072327
C	0.203305	2.094413	-0.769268
N	-3.218632	-0.206386	-0.01211
H	1.233061	3.660142	-1.780363
C	-1.194008	-1.059224	-0.004481
H	-0.614753	2.232986	-1.466481
C	-2.503101	-1.385631	-0.060606
C	-4.653378	-0.097601	-0.045193
H	-0.295736	-1.66105	-0.025857
H	-2.995894	-2.338975	-0.136984
C	-5.281851	-0.049309	-1.288462
C	-5.348875	-0.070787	1.160526
C	-6.735379	0.020518	1.094881
H	-7.300955	0.045051	2.020076
C	-6.667708	0.044203	-1.299162
H	-7.181379	0.089641	-2.25334
C	-7.408285	0.07779	-0.120585
C	-4.495772	-0.099356	-2.567
H	-3.779123	0.722511	-2.62842
H	-3.930611	-1.030831	-2.646802
H	-5.163421	-0.033551	-3.425227
C	-4.638052	-0.122295	2.482309
H	-3.897005	-0.923289	2.511229
H	-4.11523	0.816343	2.681681
H	-5.350795	-0.285973	3.289785
C	-8.90839	0.144399	-0.166242
H	-9.2509	0.766268	-0.99483
H	-9.331781	-0.853729	-0.309185
H	-9.31649	0.54671	0.761749
53
3f – gas phase
H	-2.953006	1.97748	-2.159655
Pd	-2.516474	-0.065877	-0.476992
C	-2.742206	1.88601	-1.101018
Br	-4.280546	-1.702897	0.09874
Br	-0.582125	-1.661405	-0.971032
C	-3.806786	1.628032	-0.200745
H	-4.772106	1.466877	-0.664504
C	-1.393665	1.773571	-0.698897
H	-0.662915	1.778736	-1.499903
H	0.750822	0.002206	-0.153674
C	-3.880464	2.077418	1.179498
C	-0.86015	2.128932	0.605889
C	1.221787	0.896745	0.276668
H	-4.878065	2.046062	1.602457
C	-2.898151	2.525605	1.986934
N	0.575593	1.989339	0.676478
C	-1.485467	2.49937	1.740243
N	2.516795	1.072652	0.511105
H	-3.185281	2.839865	2.982988
C	1.488908	2.890971	1.182081
H	-0.855717	2.704799	2.599176
C	2.708342	2.313127	1.080696
C	3.533917	0.090907	0.226299
H	1.18769	3.855866	1.548414
H	3.688705	2.665935	1.346372
C	4.134171	0.11594	-1.033251
C	3.828667	-0.849801	1.213072
C	3.697506	1.091879	-2.109354
C	4.801955	-1.794031	0.906031
C	3.071599	-0.908343	2.526538
H	3.198398	1.933783	-1.623628
C	2.679883	0.419861	-3.04042
C	4.872063	1.670213	-2.899288
H	5.060056	-2.550095	1.635694
H	2.581002	0.054845	2.683488
C	1.978002	-1.981251	2.447614
C	3.991022	-1.13776	3.726921
H	1.820756	0.020718	-2.496514
H	2.317333	1.132616	-3.784014
H	3.143044	-0.415871	-3.56963
H	5.620811	2.111568	-2.239017
H	5.363443	0.90864	-3.507894
H	4.515468	2.4451	-3.580081
H	1.398112	-1.999905	3.372268
H	1.289171	-1.811758	1.617216
H	2.423715	-2.968527	2.307024
H	3.416529	-1.06822	4.652123
H	4.446027	-2.129663	3.703784
H	4.792775	-0.397848	3.76526
C	5.099365	-0.851446	-1.286201
H	5.58778	-0.879575	-2.251287
C	5.431146	-1.7919	-0.326132
H	6.181361	-2.540974	-0.54671
53
3f – in CH2Cl2
H	2.862509	0.616597	2.835615
Pd	2.666213	-0.249799	0.292948
C	2.664365	1.08936	1.881239
Br	4.685642	-1.22421	-0.925474
Br	0.881067	-1.966619	-0.400321
C	3.751056	1.466219	1.062889
H	4.72792	1.198914	1.44786
C	1.340862	1.064513	1.389212
H	0.625355	0.559017	2.027824
H	-0.874069	-0.173281	0.030744
C	3.76904	2.549313	0.098496
C	0.749315	2.040454	0.487145
C	-1.336941	0.7968	0.178528
H	4.762273	2.839094	-0.226739
C	2.734806	3.2489	-0.415244
N	-0.683996	1.934919	0.397968
C	1.332243	3.005715	-0.251575
N	-2.637692	1.058999	0.173844
H	2.980727	4.056989	-1.094218
C	-1.600739	2.958596	0.533689
H	0.674977	3.631935	-0.843678
C	-2.826421	2.407466	0.392777
C	-3.675903	0.075002	0.004023
H	-1.296212	3.971689	0.729496
H	-3.810362	2.840697	0.435067
C	-4.061311	-0.66963	1.122253
C	-4.237152	-0.085764	-1.26312
C	-5.232529	-1.050234	-1.396168
H	-5.692949	-1.208555	-2.36385
C	-5.052902	-1.626416	0.932048
H	-5.375256	-2.234896	1.767721
C	-5.633037	-1.812857	-0.312533
C	-3.407474	-0.490663	2.479912
H	-2.870043	0.459157	2.479182
C	-3.789255	0.717644	-2.469637
H	-3.039138	1.440272	-2.147651
H	-6.404772	-2.562975	-0.437909
C	-4.950557	1.506606	-3.077405
H	-5.726377	0.839398	-3.4608
H	-5.405971	2.171785	-2.340277
H	-4.593571	2.117194	-3.909841
C	-4.428243	-0.425374	3.615938
H	-5.180185	0.345008	3.432489
H	-4.941773	-1.379628	3.752252
H	-3.921208	-0.18842	4.553803
C	-2.386007	-1.606448	2.722382
H	-1.873017	-1.452161	3.674581
H	-2.882694	-2.579618	2.758752
H	-1.633341	-1.642294	1.931039
C	-3.131228	-0.192055	-3.510372
H	-2.287639	-0.737508	-3.081764
H	-3.844523	-0.921133	-3.90295
H	-2.761375	0.40219	-4.349058
53
3f – in MeCN
H	-2.862509	0.616597	-2.835615
Pd	-2.666213	-0.249799	-0.292948
C	-2.664365	1.08936	-1.881239
Br	-4.685642	-1.22421	0.925474
Br	-0.881067	-1.966619	0.400321
C	-3.751056	1.466219	-1.062889
H	-4.72792	1.198914	-1.44786
C	-1.340862	1.064513	-1.389212
H	-0.625355	0.559017	-2.027824
H	0.874069	-0.173281	-0.030744
C	-3.76904	2.549313	-0.098496
C	-0.749315	2.040454	-0.487145
C	1.336941	0.7968	-0.178528
H	-4.762273	2.839094	0.226739
C	-2.734806	3.2489	0.415244
N	0.683996	1.934919	-0.397968
C	-1.332243	3.005715	0.251575
N	2.637692	1.058999	-0.173844
H	-2.980727	4.056989	1.094218
C	1.600739	2.958596	-0.533689
H	-0.674977	3.631935	0.843678
C	2.826421	2.407466	-0.392777
C	3.675903	0.075002	-0.004023
H	1.296212	3.971689	-0.729496
H	3.810362	2.840697	-0.435067
C	4.061311	-0.66963	-1.122253
C	4.237152	-0.085764	1.26312
C	5.232529	-1.050234	1.396168
H	5.692949	-1.208555	2.36385
C	5.052902	-1.626416	-0.932048
H	5.375256	-2.234896	-1.767721
C	5.633037	-1.812857	0.312533
C	3.407474	-0.490663	-2.479912
H	2.870043	0.459157	-2.479182
C	3.789255	0.717644	2.469637
H	3.039138	1.440272	2.147651
H	6.404772	-2.562975	0.437909
C	4.950557	1.506606	3.077405
H	5.726377	0.839398	3.4608
H	5.405971	2.171785	2.340277
H	4.593571	2.117194	3.909841
C	4.428243	-0.425374	-3.615938
H	5.180185	0.345008	-3.432489
H	4.941773	-1.379628	-3.752252
H	3.921208	-0.18842	-4.553803
C	2.386007	-1.606448	-2.722382
H	1.873017	-1.452161	-3.674581
H	2.882694	-2.579618	-2.758752
H	1.633341	-1.642294	-1.931039
C	3.131228	-0.192055	3.510372
H	2.287639	-0.737508	3.081764
H	3.844523	-0.921133	3.90295
H	2.761375	0.40219	4.349058
53
3f – in DMSO
H	2.859761	0.59242	2.839996
Pd	2.66057	-0.253746	0.289734
C	2.663052	1.072504	1.888978
Br	4.674891	-1.21498	-0.947029
Br	0.872176	-1.965232	-0.412404
C	3.750772	1.451552	1.072933
H	4.726666	1.177373	1.45559
C	1.339498	1.056643	1.397787
H	0.621888	0.549802	2.033093
H	-0.869123	-0.166699	0.018688
C	3.772385	2.542321	0.117616
C	0.751617	2.04021	0.501826
C	-1.333085	0.801121	0.177309
H	4.76656	2.831576	-0.205178
C	2.740561	3.249856	-0.389977
N	-0.681225	1.936993	0.409518
C	1.337473	3.009544	-0.228978
N	-2.634064	1.061443	0.179641
H	2.989245	4.062894	-1.062012
C	-1.598582	2.957724	0.559979
H	0.682053	3.641531	-0.817079
C	-2.823931	2.406785	0.415602
C	-3.670668	0.076591	0.007121
H	-1.294878	3.968815	0.767038
H	-3.808273	2.838139	0.466325
C	-4.046803	-0.678647	1.121497
C	-4.239928	-0.074251	-1.25737
C	-5.232656	-1.041044	-1.392731
H	-5.698677	-1.193017	-2.358786
C	-5.036832	-1.63647	0.929396
H	-5.352687	-2.253328	1.761376
C	-5.623857	-1.813945	-0.313241
C	-3.382824	-0.50956	2.475427
H	-2.859894	0.448338	2.483877
C	-3.804034	0.742917	-2.458635
H	-3.059911	1.470253	-2.133384
H	-6.394213	-2.565245	-0.440239
C	-4.975115	1.525107	-3.055367
H	-5.743754	0.854		-3.446484
H	-5.437918	2.175386	-2.309559
H	-4.627009	2.150906	-3.880273
C	-4.391996	-0.47663	3.62287
H	-5.158558	0.283934	3.459457
H	-4.888936	-1.440485	3.753118
H	-3.878627	-0.243647	4.558302
C	-2.343247	-1.613641	2.69331
H	-1.825924	-1.465704	3.644207
H	-2.825941	-2.594204	2.719284
H	-1.594692	-1.628826	1.897347
C	-3.141003	-0.151767	-3.508672
H	-2.290763	-0.692867	-3.087601
H	-3.848501	-0.884521	-3.905043
H	-2.779212	0.45232	-4.343883
53
3f – back H-bond – gas phase
H	2.783322	-2.140316	2.099866
Pd	3.140338	-0.34654	0.139628
C	2.44104	-1.130169	1.910103
Br	5.391491	0.605728	-0.279881
Br	2.392338	-0.8406	-2.225323
C	3.277316	-0.044181	2.264134
H	4.249929	-0.31794	2.65359
C	1.301478	-0.954472	1.089207
H	0.863391	-1.863015	0.692542
H	-2.327659	0.431801	1.777785
C	2.84317	1.29215	2.633961
C	0.395534	0.180686	1.136495
C	-2.041497	0.160823	0.776882
H	3.615252	1.891341	3.102983
C	1.638205	1.876857	2.479143
N	-0.798159	-0.020011	0.348031
C	0.507377	1.374173	1.753507
N	-2.875766	-0.066494	-0.233647
H	1.529512	2.886413	2.856379
C	-0.827419	-0.392087	-0.980856
H	-0.303827	2.079246	1.605253
C	-2.132646	-0.418708	-1.341541
C	-4.309209	0.044925	-0.156148
H	0.09687	-0.580062	-1.531679
H	-2.602039	-0.6431	-2.282554
C	-4.884071	1.288222	-0.430259
C	-5.041704	-1.08876	0.199162
C	-4.043193	2.496521	-0.801572
C	-6.420156	-0.938146	0.304449
C	-4.376258	-2.418553	0.50219
H	-3.077844	2.138972	-1.165471
C	-3.780179	3.365809	0.433427
C	-4.662577	3.323058	-1.929522
H	-7.029958	-1.787417	0.584565
H	-3.357896	-2.387584	0.110426
C	-4.28418	-2.63585	2.016462
C	-5.081295	-3.591707	-0.180786
H	-3.291061	2.799876	1.22933
H	-3.138178	4.209765	0.175271
H	-4.716472	3.759876	0.834958
H	-4.903415	2.701884	-2.793451
H	-5.575444	3.828426	-1.608228
H	-3.960195	4.093627	-2.250416
H	-3.763577	-3.569416	2.236523
H	-3.745188	-1.822498	2.506893
H	-5.280295	-2.690043	2.461405
H	-4.507886	-4.507974	-0.032338
H	-6.076784	-3.760312	0.234565
H	-5.185509	-3.424416	-1.253723
C	-6.265567	1.382153	-0.309032
H	-6.756191	2.326628	-0.504238
C	-7.023056	0.282867	0.058486
H	-8.097612	0.379472	0.150971
53
3f – back H-bond – in CH2Cl2
H	2.63593	-2.477313	1.667743
Pd	3.165485	-0.35822	0.090132
C	2.336089	-1.436259	1.657776
Br	5.537479	0.55022	-0.070433
Br	2.52641	-0.299696	-2.381465
C	3.179411	-0.476936	2.257677
H	4.109485	-0.866856	2.653574
C	1.261254	-1.05748	0.819804
H	0.8241	-1.862709	0.24081
H	-2.361169	0.196744	1.787106
C	2.778587	0.797297	2.824666
C	0.35461	0.054866	1.062393
C	-2.088876	0.074979	0.752616
H	3.540747	1.271973	3.432804
C	1.600458	1.446398	2.715145
N	-0.850848	-0.017992	0.277595
C	0.474096	1.108243	1.894397
N	-2.93496	-0.01765	-0.267027
H	1.502285	2.378626	3.259019
C	-0.905909	-0.186366	-1.092732
H	-0.339323	1.824695	1.898101
C	-2.214215	-0.183692	-1.43182
C	-4.371342	0.038163	-0.157604
H	-0.00229	-0.271902	-1.682311
H	-2.702123	-0.277166	-2.386083
C	-4.988499	1.28751	-0.25083
C	-5.064248	-1.15713	0.045235
C	-4.195087	2.566951	-0.441771
C	-6.446315	-1.068331	0.180782
C	-4.352884	-2.492232	0.169071
H	-3.212547	2.304228	-0.836532
C	-3.98321	3.25976	0.908449
C	-4.838686	3.519133	-1.449471
H	-7.023831	-1.968054	0.350806
H	-3.358566	-2.391538	-0.269124
C	-4.174398	-2.858696	1.645866
C	-5.065226	-3.611834	-0.589455
H	-3.463111	2.608378	1.614425
H	-3.388728	4.16714	0.781042
H	-4.941368	3.541044	1.352719
H	-5.036887	3.020259	-2.400249
H	-5.778297	3.932262	-1.076245
H	-4.165672	4.357406	-1.641163
H	-3.62336	-3.797014	1.740583
H	-3.624405	-2.084302	2.185026
H	-5.144934	-2.984293	2.132872
H	-4.462815	-4.522076	-0.555616
H	-6.035947	-3.845879	-0.147303
H	-5.222657	-3.348971	-1.637463
C	-6.372691	1.318656	-0.111929
H	-6.894507	2.265307	-0.171652
C	-7.09123	0.154863	0.106082
H	-8.16791	0.202139	0.217454
53
3f – back H-bond – in MeCN
H	2.628152	-2.208822	2.014997
Pd	3.171159	-0.346825	0.145575
C	2.329282	-1.180814	1.849096
Br	5.551409	0.541948	-0.135496
Br	2.541007	-0.662945	-2.316593
C	3.167013	-0.143044	2.309166
H	4.094164	-0.470359	2.764272
C	1.258584	-0.9318	0.960069
H	0.827358	-1.814	0.501479
H	-2.359223	0.417178	1.744347
C	2.762575	1.199236	2.680961
C	0.349899	0.202616	1.02881
C	-2.092215	0.160877	0.733151
H	3.51666	1.756056	3.226408
C	1.585633	1.824333	2.465485
N	-0.856359	0.011214	0.267299
C	0.466197	1.369507	1.694189
N	-2.942612	-0.061778	-0.261619
H	1.47961	2.822581	2.874139
C	-0.918283	-0.334922	-1.069123
H	-0.350557	2.075121	1.594247
C	-2.227759	-0.377134	-1.398995
C	-4.377432	0.024228	-0.157306
H	-0.018888	-0.500064	-1.646528
H	-2.721382	-0.592743	-2.330479
C	-4.977624	1.264038	-0.389341
C	-5.086502	-1.131539	0.174137
C	-4.162722	2.500626	-0.719805
C	-6.467576	-1.009521	0.297925
C	-4.393919	-2.455103	0.438869
H	-3.189262	2.176595	-1.09126
C	-3.926731	3.329254	0.547033
C	-4.798445	3.353656	-1.816932
H	-7.058689	-1.876793	0.564159
H	-3.386013	-2.402047	0.024814
C	-4.263154	-2.688554	1.946837
C	-5.098024	-3.62951	-0.240611
H	-3.437779	2.739712	1.325567
H	-3.294157	4.191431	0.323509
H	-4.875042	3.69711	0.947853
H	-5.007721	2.764004	-2.71194
H	-5.731198	3.813396	-1.483157
H	-4.116332	4.160042	-2.09447
H	-3.714745	-3.613173	2.14114
H	-3.731019	-1.866898	2.431535
H	-5.248862	-2.775129	2.411788
H	-4.508245	-4.539255	-0.109746
H	-6.084228	-3.812898	0.191638
H	-5.221324	-3.45533	-1.31157
C	-6.360805	1.330436	-0.254607
H	-6.869333	2.272635	-0.415578
C	-7.095596	0.206967	0.088612
H	-8.171392	0.281447	0.194063
53
3f – back H-bond – in DMSO
H	2.629467	-2.185715	2.042154
Pd	3.170786	-0.346326	0.148364
C	2.330557	-1.159883	1.863465
Br	5.55484	0.532107	-0.139078
Br	2.539158	-0.679935	-2.310404
C	3.168616	-0.116582	2.308884
H	4.095664	-0.437983	2.768336
C	1.259472	-0.921989	0.971792
H	0.828005	-1.810119	0.525019
H	-2.359546	0.436377	1.742692
C	2.765354	1.230826	2.661995
C	0.34965	0.21192	1.028754
C	-2.092593	0.166352	0.735008
H	3.520941	1.795349	3.197326
C	1.587518	1.852249	2.44151
N	-0.856877	0.010647	0.271001
C	0.465908	1.386421	1.680327
N	-2.942749	-0.067584	-0.257396
H	1.48205	2.855872	2.836937
C	-0.918713	-0.351048	-1.061142
H	-0.351889	2.089947	1.57438
C	-2.228007	-0.396377	-1.390742
C	-4.377209	0.023321	-0.15592
H	-0.019646	-0.522904	-1.637011
H	-2.721418	-0.622469	-2.319837
C	-4.972933	1.263473	-0.396496
C	-5.090511	-1.127821	0.181757
C	-4.154394	2.494788	-0.736444
C	-6.471047	-1.000169	0.304306
C	-4.403354	-2.452437	0.453679
H	-3.180649	2.165727	-1.102816
C	-3.92078	3.334187	0.523114
C	-4.786418	3.338009	-1.842887
H	-7.065748	-1.8635	0.57548
H	-3.393397	-2.404416	0.044094
C	-4.280937	-2.681698	1.962515
C	-5.10885	-3.62588	-0.225354
H	-3.433028	2.75159	1.307738
H	-3.287819	4.194724	0.294235
H	-4.86986	3.705168	0.919442
H	-4.996434	2.7395	-2.731902
H	-5.718296	3.804175	-1.515601
H	-4.101948	4.139453	-2.12892
H	-3.734222	-3.606069	2.162862
H	-3.750746	-1.859256	2.448062
H	-5.269001	-2.766288	2.422893
H	-4.523118	-4.537662	-0.090276
H	-6.097474	-3.804946	0.203235
H	-5.227309	-3.454189	-1.297297
C	-6.355697	1.335899	-0.262119
H	-6.861158	2.278819	-0.428416
C	-7.094352	0.217401	0.088261
H	-8.169821	0.296598	0.193526
33
4c – in MeCN
C	-0.093512	-2.874437	-1.300448
C	1.1028	-2.13199	-1.030691
C	-1.250464	-2.877857	-0.604586
C	6.207279	-1.463401	0.157171
C	3.71609	-1.275098	0.057073
C	4.949697	-0.657806	0.039929
C	1.297496	-1.234433	-0.04608
C	-1.562334	-2.238271	0.659101
C	4.974968	0.728064	-0.067938
C	2.605963	0.788161	-0.139235
C	3.802768	1.472417	-0.153375
C	-0.664739	-1.592776	1.531722
C	0.424214	-0.828995	1.043953
C	3.826502	2.965693	-0.271359
H	-0.066051	-3.468038	-2.206796
H	1.912925	-2.270358	-1.737502
H	-2.06756	-3.4564	-1.021285
H	6.008009	-2.527676	0.036363
H	6.929014	-1.154085	-0.599747
H	3.595088	-2.344047	0.155444
H	6.666023	-1.308287	1.136097
H	-2.486024	-2.575072	1.113747
H	5.930592	1.240815	-0.083293
H	4.409426	3.268281	-1.143018
H	1.640194	1.279817	-0.212112
H	2.820622	3.37276	-0.3703
H	-0.924195	-1.507712	2.58009
H	0.905041	-0.195456	1.780501
H	4.293185	3.408455	0.610515
Br	-3.953639	0.072918	-0.314959
Br	-0.769336	2.313783	-0.123358
N	2.585497	-0.553573	-0.040685
Pd	-1.486543	-0.08909	0.355125
16
1,3-Dimethylimidazolium ion – in MeCN
C	0.676765	-1.22992	1.8E-5
C	-0.67676	-1.229921	-1.1E-5
N	1.077727	0.08524	4.9E-5
N	-1.077728	0.085237	-1.0E-6
C	-2.0E-6	0.859273	3.7E-5
H	-6.0E-6	1.936442	7.9E-5
C	2.45922	0.547616	-4.5E-5
H	2.960847	0.176923	0.891438
H	2.461678	1.634497	3.94E-4
H	2.960512	0.17763	-0.892011
C	-2.459222	0.547615	-2.1E-5
H	-2.960586	0.17756	-0.89192
H	-2.461681	1.634495	3.2E-4
H	-2.960782	0.176979	0.891522
H	1.387817	-2.03792	1.5E-5
H	-1.387808	-2.037925	-4.2E-5
17
1,3-Dimethylimidazolium ion + bromide ion – H-bond (2-position) – in MeCN
C	-2.72728	1.131215	-0.017128
C	-3.123679	-0.163072	-0.018332
N	-1.352585	1.127476	0.004779
N	-1.98314	-0.931396	0.003246
C	-0.924952	-0.129522	0.016705
H	0.121334	-0.424733	0.031418
C	-0.496605	2.306648	0.015809
H	-0.692992	2.900696	-0.874713
H	0.541223	1.975935	0.020699
H	-0.704163	2.89290	0.909123
C	-1.943679	-2.386945	0.009933
H	-2.418343	-2.765746	-0.893131
H	-2.466746	-2.757579	0.889294
H	-0.904784	-2.705206	0.04022
H	-3.291695	2.047453	-0.029487
H	-4.104469	-0.605927	-0.032698
Br	2.644796	-0.185152	-0.004538
17
1,3-Dimethylimidazolium ion + bromide ion – H-bond (4-position) – in MeCN
C	-1.662023	-1.17236	-0.011042
C	-0.661406	-0.259719	-0.006775
N	-2.847321	-0.474046	-0.002326
N	-1.257373	0.980009	0.006118
C	-2.575451	0.824419	0.007275
H	-3.30323	1.618436	0.016164
C	-4.177881	-1.065653	0.005412
H	-4.297417	-1.69115	-0.876895
H	-4.915895	-0.267869	-0.008037
H	-4.30034	-1.663537	0.906422
C	-0.548913	2.25278	-0.007512
H	-0.063166	2.387075	-0.972239
H	0.197465	2.251717	0.783676
H	-1.264832	3.053178	0.160952
H	-1.640923	-2.24852	-0.017425
H	0.418436	-0.368309	-0.009593
Br	3.018766	-0.288273	0.001894
21
1,3,5-Trimethylpyridinium ion – in MeCN
C	1.145626	0.715714	-0.011872
C	1.241509	-0.658835	0.004836
C	0.054848	-1.388398	0.013264
C	-1.181165	-0.757741	0.006586
C	-1.192806	0.625378	-0.008582
N	-0.051898	1.325603	-0.020133
H	0.09971	-2.471772	0.027974
H	2.011545	1.36255	-0.017332
H	-2.109515	1.198851	-0.010591
C	-2.472528	-1.518676	-0.001643
H	-3.164873	-1.122146	0.742285
H	-2.954184	-1.438617	-0.978594
H	-2.29953	-2.573298	0.208653
C	2.578418	-1.334811	-1.68E-4
H	2.630586	-2.081324	0.793639
H	2.736563	-1.849504	-0.950204
H	3.385522	-0.616679	0.140288
C	-0.108419	2.795858	0.015969
H	-0.117487	3.121113	1.054876
H	0.764575	3.194999	-0.492677
H	-1.01252	3.125668	-0.48773
22
1,3,5-Trimethylpyridinium ion + bromide ion – H-bond – in MeCN
C	2.223101	-1.241369	0.006499
C	3.110036	-0.189785	0.016486
C	2.580506	1.100886	0.001025
C	1.212658	1.319184	-0.024098
C	0.382726	0.208675	-0.035143
N	0.89487	-1.026401	-0.018761
H	3.256993	1.948603	0.006925
H	2.536252	-2.275912	0.015841
H	-0.703209	0.282272	-0.054051
C	0.615419	2.694411	-0.025066
H	-0.167239	2.778001	-0.780414
H	0.163846	2.913697	0.94498
H	1.377244	3.446864	-0.225783
C	4.588345	-0.430344	0.044301
H	5.066026	0.035637	-0.819424
H	5.02815	0.007523	0.942318
H	4.815997	-1.495847	0.032704
C	-0.005586	-2.190993	-0.046706
H	0.130317	-2.715166	-0.990911
H	0.244246	-2.846796	0.784398
H	-1.032638	-1.840907	0.042385
Br	-3.292094	-0.019347	0.017388
22
5 – gas phase (and solution)
C	4.487302	0.267105	0.635535
C	4.488448	-0.28494	-0.622664
C	3.382975	0.62516	1.413403
C	3.385475	-0.636785	-1.405278
C	2.039764	-0.533671	-1.127453
C	2.0379	0.529361	1.12991
C	1.38044	-6.58E-4	-2.4E-5
H	5.458747	0.454541	1.079841
H	5.460709	-0.477792	-1.062844
H	3.620319	1.05971	2.379121
H	1.379313	0.921194	1.895987
H	3.624534	-1.072574	-2.370012
H	1.382313	-0.921899	-1.896335
Pd	-0.559265	0.0028	-0.003026
N	-2.67581	0.004215	-0.0032
C	-3.817372	-4.62E-4	0.0032
C	-5.266912	-0.009126	0.013849
H	-5.639554	0.999985	0.186929
H	-5.621934	-0.667665	0.806079
H	-5.638244	-0.371118	-0.944544
Br	-0.457018	2.460817	-0.173698
Br	-0.465195	-2.455634	0.169255
28
trans-Dibromo(cycloheptatrienylidene)(N-methylimidazole) palladium(II) – in MeCN
C	4.949347	-0.366099	-0.680361
C	4.948695	-0.34015	0.695563
C	3.851182	-0.293995	-1.539701
C	3.8497	-0.236934	1.550701
C	2.507163	-0.127955	1.247613
C	2.508331	-0.173595	-1.242484
C	1.859357	-0.091517	0.001149
H	5.917727	-0.456629	-1.159301
H	5.916668	-0.41233	1.178399
H	4.088806	-0.338631	-2.597456
H	1.858271	-0.138927	-2.110395
H	4.08628	-0.241185	2.609643
H	1.856235	-0.060628	2.112949
Pd	-0.09469	0.078287	-0.001908
N	-2.257731	0.268054	-4.98E-4
C	-3.133572	-0.720062	-0.015444
C	-2.993751	1.429171	0.022724
H	-2.891802	-1.769596	-0.036266
C	-4.318281	1.119563	0.021162
H	-2.515465	2.393392	0.036464
H	-5.203081	1.733642	0.034589
C	-5.605574	-1.042722	0.00101
H	-6.13679	-0.902214	0.941779
H	-6.244661	-0.743362	-0.828506
H	-5.341618	-2.092105	-0.110445
N	-4.38928	-0.249856	-0.004473
Br	-0.148049	-2.411827	0.006778
Br	0.289726	2.536563	-0.015935
6
MeCN – in MeCN
C	-0.280851	7.0E-5	-5.0E-5
C	1.174031	-2.2E-5	8.0E-6
H	1.546646	-0.654887	-0.787271
H	1.546706	-0.35438	0.960784
H	1.546364	1.009322	-0.173474
N	-1.4284	-4.9E-5	3.1E-5
12
N-Methylimidazole – in MeCN
C	-0.227589	-1.10504	-5.0E-6
C	-1.498037	-0.604535	8.0E-6
C	-0.187827	1.081712	-1.1E-5
N	0.601283	-0.014509	-5.0E-6
H	0.158867	-2.111059	-7.0E-6
H	-2.42875	-1.150555	1.6E-5
H	0.228617	2.077462	-1.9E-5
N	-1.464794	0.7687	-1.0E-6
C	2.051702	-0.037029	1.1E-5
H	2.419689	-0.546795	0.88998
H	2.419697	-0.547004	-0.889833
H	2.416966	0.987963	-1.12E-4
16
Dibromo(cycloheptatrienylidene) palladium(II) – in MeCN
C	-3.998856	0.040569	0.689219
C	-3.998864	0.039928	-0.689221
C	-2.901653	0.032405	1.550123
C	-2.901666	0.031143	-1.550125
C	-1.552192	0.018758	-1.2528
C	-1.552181	0.019629	1.252801
C	-0.932301	0.011972	1.0E-6
H	-4.971185	0.048992	1.167956
H	-4.971199	0.047854	-1.167954
H	-3.139668	0.035923	2.608205
H	-0.892701	0.014619	2.113253
H	-3.139685	0.033819	-2.608209
H	-0.89272	0.013177	-2.113255
Pd	0.988814	-0.010526	-1.0E-6
Br	1.169635	2.421342	-1.8E-4
Br	1.103164	-2.446387	1.82E-4
34
trans-Acetonitriledibromo(cycloheptatrienylidene) palladium(II) + N-methylimidazole – transition state – in MeCN
C	3.149378	-2.49778	-1.443486
C	3.038107	-3.038607	-0.200655
C	2.193715	-1.693276	-2.115666
C	1.954043	-2.907047	0.705182
C	0.909737	-2.039904	0.678293
C	1.102639	-1.050991	-1.619199
C	0.627988	-0.973903	-0.259767
H	4.029021	-2.765144	-2.01909
H	3.838001	-3.698246	0.118647
H	2.378782	-1.550512	-3.175941
H	0.540083	-0.465924	-2.336557
H	1.984102	-3.578895	1.557434
H	0.21607	-2.121593	1.503574
Pd	-1.109307	0.008733	-0.066357
N	-2.973001	1.013578	0.150181
C	-3.980487	1.541306	0.269771
C	-5.255649	2.205099	0.422482
H	-5.244397	3.147916	-0.124392
H	-5.437874	2.399635	1.47962
H	-6.046257	1.56516	0.030137
C	3.058486	0.945845	0.014199
C	2.037025	0.753204	1.899696
N	3.728115	1.709585	0.89673
H	3.33828	0.849908	-1.02262
C	3.087266	1.597842	2.105234
H	1.288627	0.412411	2.59743
H	3.433947	2.120157	2.981371
N	2.037404	0.360187	0.591335
C	4.917743	2.496367	0.626013
H	5.189643	2.366273	-0.419119
H	4.719335	3.550258	0.817727
H	5.739302	2.158418	1.256452
Br	-2.325964	-2.090067	0.510216
Br	-0.231926	2.135669	-1.02886
40
trans-Dibromo(cycloheptatrienylidene)(N-methylimidazole) palladium(II) + N-methylimidazole – transition state – in MeCN
C	-4.06694	1.700294	-1.545075
C	-4.080842	2.341629	-0.345215
C	-2.934219	1.168779	-2.213934
C	-2.970144	2.604493	0.497038
C	-1.73774	2.034074	0.488794
C	-1.70699	0.868418	-1.711672
C	-1.232007	0.96572	-0.35053
H	-5.001622	1.663958	-2.094482
H	-5.025945	2.770151	-0.028569
H	-3.084966	0.939944	-3.264639
H	-1.005249	0.437895	-2.416227
H	-3.147207	3.335545	1.280117
H	-1.054499	2.386578	1.248899
Pd	0.664029	0.319355	-0.073964
C	-3.139647	-1.4842	0.072161
C	-2.348484	-0.768735	1.941503
N	-3.606151	-2.306753	1.029509
H	-3.362608	-1.605751	-0.975374
C	-3.108491	-1.863267	2.22972
H	-1.781771	-0.136122	2.606387
H	-3.336676	-2.361907	3.157127
N	-2.381699	-0.550139	0.593448
C	-4.485828	-3.44504	0.835868
H	-4.65294	-3.580988	-0.230529
H	-4.022799	-4.342896	1.243124
H	-5.440911	-3.270622	1.330551
Br	1.471388	2.616099	0.474394
Br	0.180479	-1.941653	-1.020403
C	3.492952	-0.890192	-0.6104
N	4.684813	-1.138865	-0.044387
H	3.265704	-1.130762	-1.635158
C	3.361225	-0.23121	1.437061
C	4.615917	-0.728862	1.262927
H	2.918394	0.203295	2.316969
H	5.451162	-0.827537	1.935661
N	2.668642	-0.3402	0.257477
C	5.838766	-1.734347	-0.693349
H	6.677579	-1.039863	-0.666449
H	6.112908	-2.659266	-0.187475
H	5.586398	-1.951254	-1.729013
28
trans-Dibromo(cycloheptatrienylidene)(N-methylimidazole) palladium(II) – rearrangement to 3a – transition state – in MeCN
C	0.6156	3.611424	1.680701
C	0.305485	4.01864	0.42083
C	0.554204	2.297353	2.204413
C	-0.142818	3.228643	-0.667582
C	-0.333738	1.88614	-0.754842
C	0.238845	1.1193	1.596458
C	-0.120429	0.874743	0.236687
H	0.928724	4.377274	2.380898
H	0.398115	5.079532	0.216333
H	0.792225	2.215355	3.259992
H	0.277132	0.240033	2.227196
H	-0.368005	3.783333	-1.572383
H	-0.675629	1.51985	-1.71378
Pd	-1.134068	-0.773879	0.031857
C	2.895702	0.392009	-0.038456
C	1.94974	-0.423477	-1.796408
N	3.879212	-0.081198	-0.824335
H	3.070103	0.860661	0.917701
C	3.291761	-0.602337	-1.950144
H	1.142497	-0.705969	-2.452749
H	3.87465	-1.046032	-2.740088
N	1.725066	0.195618	-0.598547
C	5.303469	-0.04809	-0.542022
H	5.460231	0.467238	0.403035
H	5.692302	-1.062989	-0.467103
H	5.82523	0.486151	-1.334912
Br	-3.214833	0.223528	-0.800773
Br	0.334052	-2.496185	1.001709
34
6 – in MeCN
C	-3.344702	2.401521	-0.783308
C	-3.307435	2.570856	0.558577
C	-2.205569	2.133429	-1.62282
C	-2.123791	2.517675	1.377334
C	-1.000894	1.817278	1.140686
C	-1.071795	1.499674	-1.275422
C	-0.850309	0.793014	0.040336
H	-4.28257	2.603176	-1.291138
H	-4.217866	2.900409	1.049284
H	-2.274696	2.50266	-2.642218
H	-0.262934	1.474059	-1.993999
H	-2.144966	3.128898	2.275391
H	-0.15567	1.969779	1.797591
Pd	1.051937	-0.024266	0.044529
N	3.053822	-0.770297	0.010529
C	4.124533	-1.167604	-0.053485
C	5.476153	-1.674551	-0.14091
H	5.464405	-2.658832	-0.609167
H	5.901201	-1.75435	0.859804
H	6.082594	-0.994789	-0.739713
C	-2.528375	-0.906067	-0.739108
C	-2.361762	-0.716674	1.43414
N	-3.357753	-1.788485	-0.194628
H	-2.385245	-0.762447	-1.794717
C	-3.267625	-1.686625	1.172252
H	-1.996106	-0.335887	2.370056
H	-3.85196	-2.308774	1.827648
N	-1.920778	-0.229931	0.227078
C	-4.209371	-2.713946	-0.924412
H	-4.048801	-2.567209	-1.989591
H	-3.949754	-3.735961	-0.653444
H	-5.252557	-2.519046	-0.681802
Br	2.057595	2.265423	-0.082664
Br	0.359103	-2.422919	0.04734
40
8 – in MeCN
C	-4.317168	0.026428	-1.665291
C	-4.310441	1.29999	-1.188512
C	-3.175974	-0.630922	-2.229132
C	-3.162353	2.156733	-1.193505
C	-1.869897	1.77468	-1.107565
C	-1.881666	-0.415921	-1.907616
C	-1.420987	0.390627	-0.72347
H	-5.277151	-0.467819	-1.776555
H	-5.265593	1.754835	-0.945878
H	-3.379004	-1.34858	-3.019195
H	-1.113303	-0.871819	-2.515922
H	-3.359046	3.216748	-1.329467
H	-1.096638	2.508461	-1.284521
Pd	0.594788	0.171592	-0.262583
C	-2.547289	-1.266611	0.798199
C	-2.306487	0.742857	1.636523
N	-3.002065	-1.294129	2.046867
H	-2.518665	-2.106706	0.128384
C	-2.861421	-0.03952	2.591212
H	-2.010873	1.776377	1.654073
H	-3.165339	0.179226	3.600248
N	-2.122394	-0.041107	0.520637
C	-3.591347	-2.447155	2.709619
H	-3.490898	-3.312433	2.059356
H	-3.068869	-2.630605	3.646451
H	-4.645327	-2.25605	2.904511
Br	0.824861	2.513087	0.581205
Br	0.521594	-2.27957	-0.759894
C	3.654395	-0.122858	-0.641819
N	4.822252	-0.323644	-0.00686
H	3.578435	-0.009272	-1.710489
C	3.201481	-0.281973	1.457434
C	4.550043	-0.429314	1.3325
H	2.595568	-0.293813	2.347806
H	5.327325	-0.593091	2.059761
N	2.656444	-0.092228	0.214903
C	6.13106	-0.425025	-0.626747
H	6.800003	0.326152	-0.208692
H	6.547784	-1.417923	-0.460974
H	6.024056	-0.254314	-1.69572
28
7 – in MeCN
C	-1.227944	3.610166	-0.602247
C	-1.118046	3.646022	0.745433
C	-0.406178	2.830404	-1.49145
C	-0.158641	2.913415	1.530714
C	0.408216	1.734408	1.227401
C	0.205266	1.665663	-1.219634
C	-0.01669	0.896647	0.053494
H	-1.904944	4.317085	-1.070351
H	-1.713378	4.379451	1.279258
H	-0.25437	3.247247	-2.482496
H	0.876876	1.241606	-1.953255
H	0.147658	3.381878	2.461087
H	1.189361	1.347233	1.866906
Pd	1.069676	-0.797745	0.004287
C	-2.258601	0.229679	-0.817894
C	-2.096138	0.269073	1.37425
N	-3.409069	-0.19084	-0.319963
H	-2.026414	0.314339	-1.864943
C	-3.330901	-0.173497	1.054991
H	-1.628177	0.415575	2.330493
H	-4.159213	-0.473772	1.672959
N	-1.439307	0.525031	0.19074
C	-4.56718	-0.617748	-1.092081
H	-4.356717	-0.473608	-2.14859
H	-4.758983	-1.670801	-0.894676
H	-5.430411	-0.020989	-0.804006
Br	3.255303	0.308794	-0.191244
Br	-0.508067	-2.699472	0.126591
28
9 – in MeCN
C	3.222178	-0.670343	-1.974653
C	2.921359	-1.94288	-1.611559
C	2.255327	0.323173	-2.345579
C	1.592822	-2.481734	-1.547848
C	0.461937	-1.807739	-1.264075
C	0.990333	0.424431	-1.893917
C	0.466556	-0.396674	-0.749617
H	4.265312	-0.427557	-2.147502
H	3.739424	-2.648641	-1.513243
H	2.572301	1.045077	-3.09198
H	0.314208	1.131652	-2.350575
H	1.49054	-3.535681	-1.788025
H	-0.494718	-2.292594	-1.385528
Pd	-1.34298	0.21691	-0.113544
C	1.967044	0.834135	0.820934
C	1.450126	-1.209012	1.45083
N	2.529542	0.620468	1.99863
H	2.024605	1.748024	0.256552
C	2.219786	-0.656359	2.413151
H	0.99143	-2.178646	1.385259
H	2.578459	-1.051341	3.347643
N	1.30772	-0.264917	0.456013
C	3.346697	1.573389	2.737184
H	3.408782	2.495592	2.165604
H	2.883266	1.766816	3.702467
H	4.3423	1.157005	2.877482
Br	-2.277586	-1.894682	0.740307
Br	-1.109976	2.648431	-0.443928
28
Dibromo(1-(3-methylimidazolium-1-yl)cycloheptatrienyl) palladium(II) – conformational change – transition state – in MeCN
C	2.127339	2.864579	1.446318
C	1.789868	3.447083	0.272637
C	1.311705	1.935193	2.181343
C	0.55289	3.247149	-0.43351
C	-0.232287	2.156384	-0.422246
C	0.40303	1.081391	1.678114
C	0.184364	0.853982	0.212083
H	3.027142	3.212641	1.942308
H	2.439888	4.228928	-0.105822
H	1.446069	1.932464	3.25866
H	-0.200898	0.498999	2.362597
H	0.208224	4.089006	-1.026779
H	-1.187246	2.19113	-0.922646
Pd	-1.205114	-0.597338	0.028637
C	2.479037	-0.175072	0.084171
C	1.527856	0.281629	-1.845021
N	3.292662	-0.584405	-0.875814
H	2.665318	-0.269509	1.138601
C	2.714538	-0.311039	-2.095954
H	0.767637	0.646525	-2.512846
H	3.203808	-0.556564	-3.02257
N	1.397081	0.362603	-0.474027
C	4.597097	-1.200264	-0.681207
H	4.751484	-1.363532	0.382023
H	4.622656	-2.152477	-1.206996
H	5.369496	-0.539001	-1.069655
Br	-3.291437	0.604287	-0.488858
Br	0.170318	-2.546418	0.675554
28
Dibromo(1-(3-methylimidazolium-1-yl)cycloheptatrienyl) palladium(II) – rearrangement to 3a – transition state from 7 – in MeCN
C	1.386039	3.756451	-0.54186
C	1.470447	3.699098	0.799012
C	1.117185	2.667513	-1.450507
C	1.307591	2.536175	1.638364
C	0.760445	1.346465	1.356186
C	0.611658	1.451612	-1.205114
C	0.12499	0.88522	0.087783
H	1.590553	4.711368	-1.01418
H	1.737844	4.611609	1.321365
H	1.350023	2.874955	-2.490338
H	0.497749	0.79076	-2.057969
H	1.667972	2.656026	2.655407
H	0.739103	0.617804	2.159945
Pd	0.603895	-1.076147	-0.006965
C	-2.185217	1.012489	-0.8543
C	-2.084202	1.07472	1.341449
N	-3.424022	1.062134	-0.393754
H	-1.912017	0.959071	-1.893722
C	-3.385578	1.104763	0.980975
H	-1.628856	1.082332	2.314799
H	-4.284436	1.155963	1.570388
N	-1.344976	1.019255	0.180315
C	-4.634051	1.078309	-1.203604
H	-4.357576	0.965756	-2.248658
H	-5.273836	0.251289	-0.902201
H	-5.152727	2.024005	-1.058166
Br	3.067114	-0.873919	-0.260193
Br	-1.532994	-2.310217	0.196406
28
Dibromo(1-(3-methylimidazolium-1-yl)cycloheptatrienyl) palladium(II) – rearrangement to 3a – transition state from 9 – in MeCN
H	2.843714	-2.507925	2.395744
Pd	-1.042629	-0.349285	-0.060477
C	2.570174	-2.068214	1.441218
Br	-3.296735	-0.131306	-1.242145
Br	-1.142052	0.769469	2.105734
C	3.564129	-2.16056	0.402005
H	4.586374	-2.310709	0.733543
C	1.350585	-1.51284	1.345065
H	0.660348	-1.58087	2.175718
H	1.39236	0.797228	-2.16996
C	3.327261	-2.23721	-0.928764
C	0.903892	-0.756997	0.137589
C	1.767989	1.138112	-1.220617
H	4.171184	-2.444589	-1.578015
C	2.030246	-2.232638	-1.552926
N	1.676828	0.478872	-0.064451
C	0.931409	-1.641108	-1.056411
N	2.401175	2.281549	-1.007685
H	1.940099	-2.771512	-2.49048
C	2.267324	1.24031	0.918923
H	-0.022322	-1.801769	-1.581076
C	2.72898	2.364228	0.325817
H	2.311747	0.917072	1.942506
H	3.25555	3.21232	0.727799
C	2.74858	3.264586	-2.024435
H	2.454751	4.252034	-1.67522
H	3.821824	3.23584	-2.20424
H	2.213426	3.025332	-2.939844
28
3a – alpha-isomer – in MeCN
H	-0.361863	3.30078	2.746214
Pd	0.745726	-0.017579	-0.146563
C	-0.117081	2.837385	1.797337
Br	3.006356	-0.894814	-0.960046
Br	0.162904	-1.933216	1.426989
C	1.182509	3.152256	1.270315
H	1.802317	3.773703	1.907572
C	-1.038575	1.997148	1.289619
H	-1.946175	1.842028	1.862798
H	-1.992859	-1.407609	0.071574
C	1.734695	2.743615	0.108145
C	-0.987515	1.242341	0.041413
C	-2.636973	-0.603969	-0.253954
H	2.759373	3.04064	-0.084033
C	1.132616	1.977437	-0.965864
N	-2.285438	0.677401	-0.300589
C	-0.203128	1.576755	-1.103212
N	-3.898064	-0.707026	-0.643808
H	1.704538	1.967674	-1.885762
C	-3.366653	1.418822	-0.733353
H	-0.593892	1.351442	-2.088662
C	-4.37656	0.546794	-0.949117
H	-3.307653	2.486723	-0.853316
H	-5.385027	0.700308	-1.292511
C	-4.667661	-1.942582	-0.704303
H	-5.09996	-2.045542	-1.697256
H	-4.000276	-2.776849	-0.505007
H	-5.455536	-1.912264	0.045897
28
3a – ipso-isomer – gas phase (and solution)
H	-2.117807	2.892699	-1.766727
Pd	-0.728582	-0.196937	0.092423
C	-1.691688	2.607866	-0.811649
Br	0.248423	-2.081221	1.557067
Br	-1.898448	-1.401159	-1.717264
C	-2.284871	3.097715	0.295851
H	-3.120991	3.769683	0.140707
C	-0.565967	1.701041	-0.913678
H	-0.208659	1.534413	-1.923849
H	1.986409	-0.816827	0.378098
C	-2.013861	2.753153	1.662363
C	0.401599	1.468423	0.110935
C	2.424547	0.068053	-0.095159
H	-2.71484	3.151932	2.387276
C	-1.045045	1.952084	2.155869
N	1.775382	1.216518	-0.280293
C	0.058888	1.321227	1.468352
N	3.649028	0.203808	-0.587797
H	-1.067187	1.747847	3.219807
C	2.608278	2.108357	-0.916701
H	0.838707	0.932516	2.113052
C	3.786482	1.472806	-1.110583
H	2.284757	3.102514	-1.168957
H	4.698933	1.805526	-1.572775
C	4.657516	-0.848323	-0.604721
H	5.542027	-0.516129	-0.064506
H	4.243861	-1.729589	-0.120715
H	4.914292	-1.088892	-1.634665
28
3a – ipso to alpha transition state – gas phase (and solution)
H	0.226951	2.787548	3.044999
Pd	0.739262	-0.193342	0.039465
[truncated: 1,553 more rows]
